# Supplementary material
Source: ML conference proceedings conference paper supplement (https://openreview.net/forum?id=a3ymtHbL5p5)

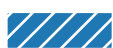

Minority

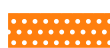

Majority

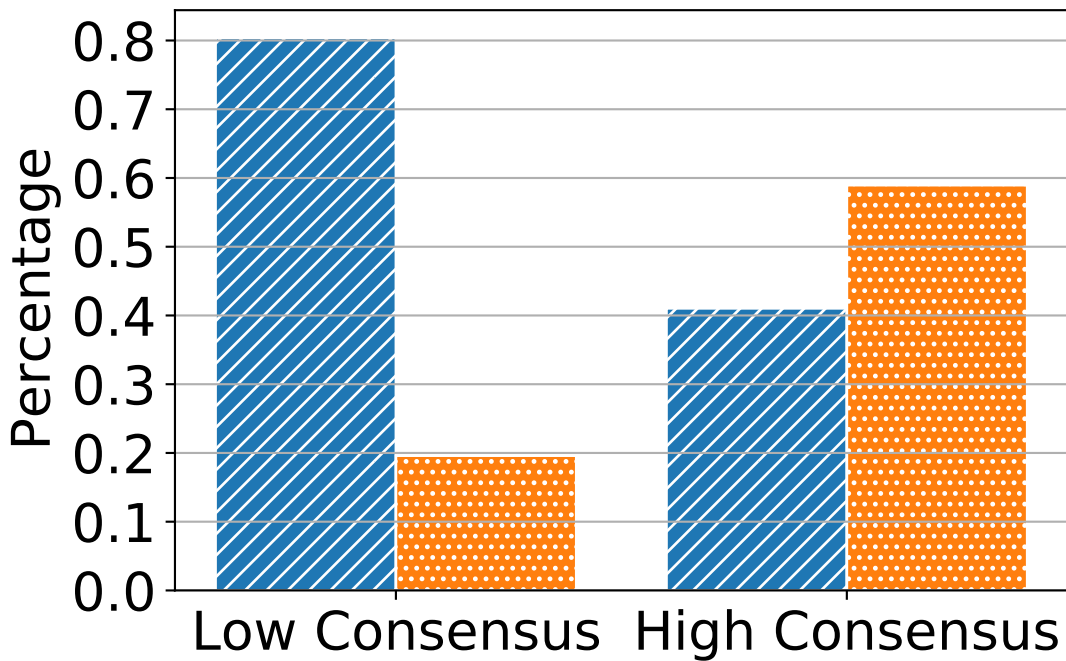

Supplement: supplementary_material [file attachment]



Minority

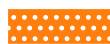

Majority

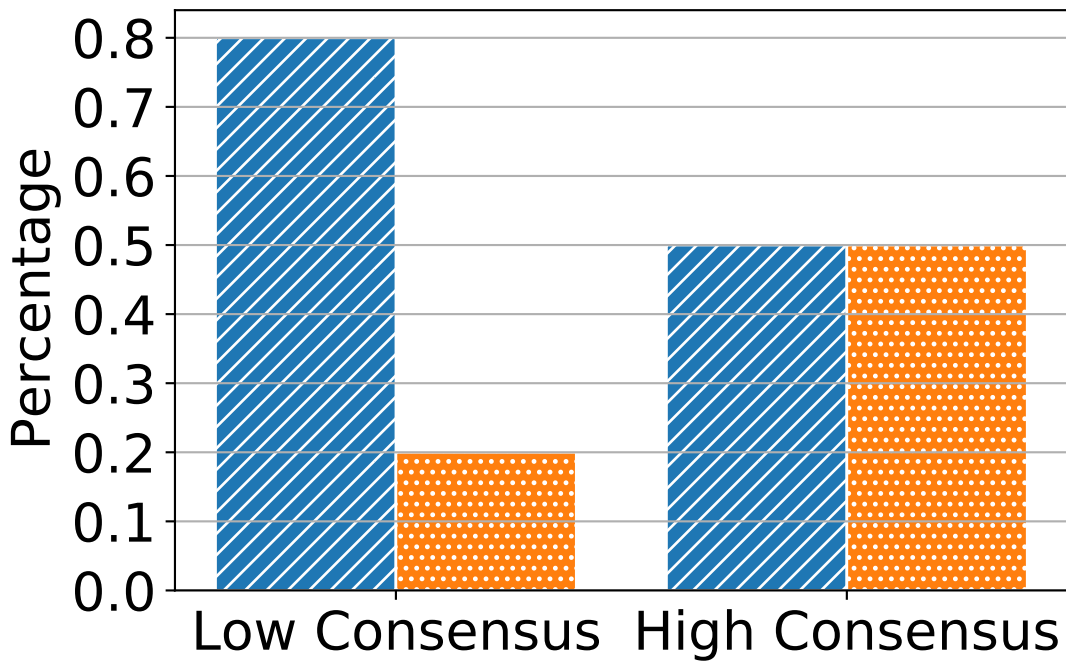

Supplement: supplementary_material [file attachment]
